## **The fluoride permeation pathway and anion recognition in Fluc family fluoride channels**

Benjamin C. McIlwain<sup>1</sup>, Roja Gundepudi<sup>2</sup>, B. Ben Koff<sup>1</sup>, and Randy B. Stockbridge\*<sup>1,2</sup>

1. Department of Molecular, Cellular, and Developmental Biology, University of Michigan, Ann Arbor, MI 48109, USA

2. Program in Biophysics, University of Michigan, Ann Arbor, MI 48109, USA

\*To whom correspondence should be addressed. Email address: [stockbr@umich.edu](mailto:stockbr@umich.edu). Telephone: 734-764-3631

### **Abstract**

Fluc family fluoride channels protect microbes against ambient environmental fluoride by undermining the cytoplasmic accumulation of this toxic halide. These proteins are structurally idiosyncratic, and thus the permeation pathway and mechanism have no analogy in other known ion channels. Although fluoride binding sites were identified in previous structural studies, it was not evident how these ions access aqueous solution, and the molecular determinants of anion recognition and selectivity have not been elucidated. Using x-ray crystallography, planar bilayer electrophysiology and liposome-based assays, we identify additional binding sites along the permeation pathway. We use this information to develop an oriented system for planar lipid bilayer electrophysiology and observe anion block at one of these sites, revealing insights into the mechanism of anion recognition. We propose a permeation mechanism involving alternating occupancy of anion binding sites that are fully assembled only as the substrate approaches.

## Introduction

Microbes are protected from the cytoplasmic accumulation of environmental fluoride ion by export of the toxic anion via fluoride channels known as Flucs [1,2]. These small, homodimeric ion channels are remarkable proteins in two regards: first, their unusual “dual topology” architecture, in which the two subunits of the homodimer are arranged antiparallel with respect to each other [3,4], yielding a double-barreled pair of pores related by two-fold symmetry [5-8]. Second, the Flucs stand out among anion channels for their extreme substrate selectivity [4]. In contrast to most characterized families of anion channels, which tend to be non-selective among anions, and sometimes poorly discriminate against cations, the Flucs are arguably the most selective ion channels known, with >10,000 fold selectivity against the biologically abundant chloride [4]. This extreme selectivity prevents collapse of the membrane potential due to chloride or cation leak through the Fluc channels, which are constitutively open. Among anion channels, the stringent selectivity displayed by the Flucs is atypical. Most characterized anion channels handle the most abundant ion in their milieu, usually chloride ion, and other halides and pseudohalides that might compete with the physiological ion are present at much lower concentrations.

Crystal structures of representative Fluc channels from *Bordetella pertussis* (Fluc-Bpe) and an *Escherichia coli* virulence plasmid (Fluc-Ec2) provide an opportunity to understand the molecular basis for anion permeation in the Flucs [5,9]. The protein possesses two deep, aqueous vestibules with electropositive character due to an absolutely conserved arginine sidechain and a deeply buried sodium ion at the center of the protein [10]. These structures captured four electron densities assigned as fluoride ions, two in each pore, positioned near the center of the protein, some distance from the vestibules. These ions are aligned along the polar face of TM4, referred to as the polar track. They are located 6-10 Å from the aqueous solution, with no clear aqueous pathway leading to the external solution. Mutation of the sidechains that coordinate the proposed fluoride ions inhibits fluoride throughput, but does not alter the ion selectivity of these proteins [5,11]. Thus, characterizing the rest of the fluoride permeation route is the first step towards identifying the residues responsible for fluoride ion recognition.

Here we combine x-ray crystallography, planar lipid bilayer electrophysiology, and liposome flux assays to identify access points to the polar track, including a non-specific anion binding site at the bottom of the aqueous vestibule. We propose that fluoride ions accumulate in

this electropositive vestibule before entering the fluoride-selective region of the pore, reprising a familiar feature of many ion channels. After traversing the polar track, the fluoride ions then emerge at another point in the opposite vestibule on the opposite side of the membrane, near a conserved glutamate that plays a role in discriminating against  $\text{Cl}^-$ .

## Results

### Anions enter the fluoride pathway through the electropositive vestibule

The electropositive vestibule, lined with conserved, polar sidechains, is an obvious candidate for fluoride entry into the channel. Spherical, non-protein electron densities were observed in this region, but without additional evidence of anionic character, they were assigned as water molecules [5]. To test whether any of these densities might better be assigned as anions, we endeavored to crystallize Fluc channels with bromide ( $\text{Br}^-$ ), an anomalous scatterer. We were unable to generate diffracting Fluc-Bpe crystals in the presence of  $\text{Br}^-$ , but we were successful in solving the structure of Fluc-Ec2 in the presence of 100 mM  $\text{Br}^-$  (Supplementary Table 1).

Anomalous difference maps show two prominent peaks, located in equivalent, non-crystallographic symmetry-related positions at the bottom of the aqueous vestibules (Figure 1A). These densities are coordinated by a sidechain that is invariant among Fluc channels, Ser81, along with the highly conserved Thr82 (Figure 1B, upper panel). In maps from previous Fluc-Bpe structures [5], a positive density occupies this same position between the homologous hydroxyl sidechains (Figure 1B, lower panel). This site is exposed to bulk water in the vestibule, but is likely to be partially dehydrated, with aliphatic sidechains including Ile48 in close proximity to the bound bromide ion (Figure 1C).

In order to test whether this anion binding site is part of the fluoride permeation pathway, we introduced an I48C mutation to Fluc-Ec2 and assessed the effect of modification by a bulky, anionic, thiol-reactive reagent, MTSES, on fluoride conduction. In planar lipid bilayers, I48C mediates robust fluoride currents, which rapidly diminish by ~50% upon addition of MTSES to the *cis* chamber (Figure 1D), consistent with full modification of a *cis*-facing thiol in a population of channels with oppositely oriented pores. In contrast, MTSES addition to WT channels does not alter the fluoride currents. We sought to recreate the MTSES block experiment in Fluc-Bpe channels, but we did not observe efficient labeling of a cysteine introduced at the corresponding position, Ile50. However, mutation of Ile50 in Bpe to a bulkier tryptophan

sidechain diminished the rate of fluoride transport by ~400-fold in liposome efflux experiments, possibly by sterically hindering fluoride access to the bottom of the vestibule (Supplementary Figure 1).

In order to probe the role of the anion coordinating sidechains in more detail, we mutated Fluc-Ec2's bromide-coordinating Ser81 to alanine, threonine or cysteine, and also constructed a S81A/T82A double mutant. For all four mutants, we measured fluoride channel activity using either single channel electrophysiology or bulk liposome efflux experiments (Figure 2A, 2B), and we solved x-ray crystal structures of the mutants together with Br<sup>-</sup> (Figure 2C). No other halides or pseudohalides were present in crystallization solutions.

The functional experiments showed that fluoride throughput is inhibited in these mutants. S81A had a mild effect, with a ~60% decrease in conductance to 2 pS, compared to 5 pS for the WT protein (Figure 2B). The S81A/T82A double mutant had a more severe effect, with fluoride throughput diminished to  $1510 \pm 30 \text{ s}^{-1}$ , a ~200-fold reduction in the rate (Figure 2A). In accord with the fluoride transport experiments, a strong anomalous peak persisted in the S81A structure, but had almost entirely disappeared in the S81A/T82A double mutant (Figure 2C).

The S81C and S81T phenotypes were more extreme: for both mutants, fluoride efflux from liposomes was completely abolished (Figure 2A). From the structural data, it is not readily apparent why S81T does not transport fluoride. A bromide density is observed in a similar position, coordinated by the threonine's hydroxyl, and with similar intensity as wildtype, and the surrounding residues are not perturbed by this mutation.

In contrast, the structure of S81C provides a possible explanation for the lack of fluoride transport observed in the liposome flux assays. A strong anomalous density is present in the vestibule, but has moved 2 Å away from the Cys81 sidechain, towards the vestibule Arg22 (Figure 2D). The thiol, in turn, is slightly displaced in the opposite direction. We posit that the electropositive environment of the vestibule perturbs the cysteine pK<sub>a</sub> such that it is deprotonated at the pH of these experiments (pH 9 in the crystal structure, and pH 7.5 in the liposome flux experiments). In order to test this idea explicitly, we monitored currents mediated by Ec2 S81C in planar lipid bilayers as a function of changing pH. Whereas fluoride currents were near zero at pH 7.4, currents increased dramatically when the pH was decreased to 5.5 (Figure 2E). The increase in F<sup>-</sup> currents was fully reversible with pH, and WT activity was not altered by changing



pH over this range. The analogous mutation in Fluc-Bpe channels, S83C, exhibits similar pH sensitivity (Figure 2E).

Taken together, these experiments show that the anion binding site at the bottom of the vestibule is on the pathway for fluoride permeation. This anion binding site is located immediately adjacent to one of the fluoride ions in the polar track, and we imagine fluoride ions enter the vestibule, become dehydrated, before eventually being stripped of water entirely as the ion is translocated from the bottom of the vestibule to the polar track. Translocation between the vestibule and the polar track must contribute to anion selectivity since the bromide anomalous density is observed in the former location, but never the latter. However, we could not detect any change in chloride transport by these mutants (Supplementary Figure 2), motivating us to search for additional pore-lining sidechains on the opposite end of the pore.

### **A trio of sidechains defines the opposite end of the pore**

To identify additional pore-lining sequences, we began by analyzing the sequences of the eukaryotic relatives of the homodimeric bacterial Flucs, known as FEX proteins [12]. Whereas the bacterial Flucs assemble as dual-topology homodimers with a pair of symmetry-related pores, the eukaryotic fluoride channels are expressed as a two-domain single polypeptide with a linker helix that enforces antiparallel topology of the domains [13]. In the FEX proteins, this ancient fusion event has permitted drift of redundant sequences, including degradation of one of the two pores [14]. A clear pattern has been identified in which residues that line one pore (mostly, but not entirely, from the C-terminal domain) are highly conserved, whereas the corresponding residues from the second, vestigial pore (mostly, but not entirely, from the N-terminal domain) have drifted [5,13,14]. We reasoned that other amino acids that follow this pattern of conservation and degradation might be expected to also contribute to the pore.

We selected representative eukaryotic FEX proteins from yeasts and plants, and aligned the N- and C- terminal domains with the sequence of Fluc-Bpe in order to identify residues that follow eukaryotic pore conservation patterns (Figure 3A). We chose Fluc-Bpe for this analysis rather than Fluc-Ec2, because Fluc-Bpe has higher sequence homology to the eukaryotic FEX domains. We identified three additional residues that follow the same pattern of conservation as other pore-lining sequences: a threonine, a tyrosine, and a glutamate. In the Fluc-Bpe structure, the homologous three sidechains (Thr39, Glu88, and Tyr104) associate within hydrogen bonding

distance of each other; one contributed by each pore-lining helix, TM2, TM3, and TM4. They are positioned near the protein's aqueous vestibules, and Tyr104 is also within hydrogen bonding distance of a fluoride ion within the pore (Figure 3B).

These residues are well-conserved among Flucs more generally [15]. From an alignment of all homodimeric Fluc sequences in the PFAM database[16], we found that Thr39 is conserved in ~95% of the sequences we studied, Glu88 is conserved in >85% of sequences (~10% Asp, and ~5% Gln), and Tyr104 is conserved in 55% of sequences (~35% Asn, ~15% Ser). The strong conservation of these residues across multiple kingdoms, the asymmetric distribution among eukaryotic domains that is consistent with other pore-lining sequences, and their close spatial relationship to one another motivated further functional analysis of this molecular triad.

T39 and Y104 proved sensitive to mutagenesis, and only conservative mutations were permitted at these positions. Using bulk liposome efflux assays as a binary measurement of F<sup>-</sup> transport, we found that we obtained transport-competent mutants when Thr39 was replaced by Ser, but not Val, Asn, Ala, or Cys (Supplementary Figure 3). When Tyr104 was replaced by Phe, robust fluoride efflux activity was observed, but mutants with Ser, His, Ile, or Trp in this position all had anemic fluxes in the range of 100 ions/sec (Supplementary Figure 3). Glu88 was somewhat more permissive: Ala, Asp, and Gln were all tolerated, but not Lys. In order to probe whether Glu88 is in the anionic carboxylate form or protonated at pH 7, we performed bilayer experiments in which we recorded currents at pH 7 and then raised the pH in a stepwise fashion to pH 8.7. We observed reduced fluoride currents as pH was increased, but the difference in these effects between channels bearing Glu and Gln at position 88 was minimal (Supplementary Figure 4). Since changing the protonation state of an acidic sidechain along the permeation pathway would be expected to have substantial ramifications for fluoride currents, these experiments suggest that the protonation state of Glu88 does not change as the pH is increased from 7 to 8.7. It therefore seems more likely that Glu88 is not protonated at physiological pH.

Those triad mutants that permitted fluoride transport in efflux assays did not show significantly altered maximal F<sup>-</sup> conductance in single channel electrophysiology experiments. T39S, E88D, Y104F retained F<sup>-</sup> conductance at or near WT levels, whereas E88Q exhibited conductance ~20% of wildtype (Figure 3C, 3D). T39S and Y104F both showed differences in dynamic behavior compared to WT Fluc-Bpe proteins, which are constitutively open and show no closures or sub-conductance states. T39S undergoes long periods of robust throughput ( $\tau_o =$

9.2 ± 0.2 s), punctuated by brief channel closures ( $\tau_c = 35.3 \pm 0.4$  ms) (Figure 3D). Y104F was more dynamic, with shorter open intervals ( $\tau_o = 1.9 \pm 0.2$  s and  $\tau_c = 33.2 \pm 2.5$  ms) (Figure 3D, *inset*). Thus, single-channel recordings suggest that one role of the triad is to stabilize the three pore-lining helices in an open, fluoride-conducting conformation. Upon addition of channel-binding monobodies [3,8], familiar current block is observed, indicating that despite the increased conformational flexibility, the structure of the channel is not perturbed to a significant extent (Supplementary Figure 5).

### **Anion recognition at the triad**

None of the fluoride-conductive mutants constructed thus far transports chloride ion, as probed using our most sensitive metric of chloride transport, liposome efflux assays (Supplementary Figure 6). However, we noticed that halides and pseudohalides inhibit fluoride currents with a wide range of potencies (Figure 4A, Supplementary Table 2). The recognition series ( $\text{OCN}^- > \text{SCN}^- > \text{NO}_3^- > \text{Cl}^-$ ) deviates from common determinants of anion selectivity, such as anion radius,  $\Delta G_{\text{hydration}}$ ,  $\Delta G_{\text{Born}}$  or the lyotropic (Hofmeister) series (Supplementary Table 3, Supplementary Figure 7). In these titrations, full inhibition of the fluoride currents is not achieved. The inhibitory effects are best fit by a two-site binding isotherm, with weak binding to a second site (Supplementary Table 2). Because the Fluc channel possesses a pair of antiparallel pores, the observed behavior might reflect anion interactions at both the vestibule and triad sides of the channel. In order to separate the effects of anion block at these two positions, and to better quantify the affinity, we exploited the S83C vestibule mutant described in Figure 2E by recording channels under asymmetric pH conditions. The *cis* side of the bilayer was maintained at pH 7.5, silencing any pore with a *cis*-facing vestibular S83C. The *trans* side of the bilayer was adjusted to pH 5.5, so that pores with a *trans*-facing vestibular S83C retained WT-like function (Figure 4B).

With this oriented system, we tested the effect of  $\text{OCN}^-$  and  $\text{Cl}^-$  addition to the *cis* (pH 7.5) side of the bilayer, isolating anion interactions at the side of the pore defined by the T-E-Y triad. In  $\text{OCN}^-$  titration experiments, currents were reduced almost to the zero-current level at 30 mM  $\text{OCN}^-$ , showing that the higher affinity  $\text{OCN}^-$  binding site is on the triad-side of the pore (Figure 4C). Using the oriented system, we performed  $\text{OCN}^-$  addition experiments in the presence of 30-300 mM  $\text{F}^-$ . The apparent affinity of  $\text{OCN}^-$  increased as  $\text{F}^-$  concentration

decreased, showing that binding and inhibition at the triad site is competitive with fluoride (Figure 4D). For both  $\text{OCN}^-$  and  $\text{Cl}^-$ , block of the fluoride currents was well approximated by a single site binding isotherm that saturates at full inhibition, although we did not perform experiments at the  $\sim$ molar  $\text{Cl}^-$  concentrations that would be required to fully block currents (Figure 4E, Supplementary Table 2). In contrast, fits to the data with the two-site binding model used for the dual topology WT channels were poor. Under our usual experimental conditions with 300 mM  $\text{F}^-$ , fit to a single site binding isotherm yielded  $K_i$  values of  $\sim$ 400 mM for chloride, the most abundant biological halide, and 8 mM for  $\text{OCN}^-$ , in very good agreement with the value estimated from the dual topology WT channels (Supplementary Table 2). Although  $\text{OCN}^-$  blocked Fluc-Bpe with relatively high affinity, liposome flux experiments showed that  $\text{OCN}^-$  is not permeant (Supplementary Figure 9).

It is notable that one of the participants in the triad, E88, is itself an anion. In order to understand the interplay between the E88 carboxylate and the blocking anions, we mutated E88 to glutamine on the S83C background and measured fluoride current inhibition by  $\text{Cl}^-$  and  $\text{OCN}^-$ . The appreciable  $\sim$ 60-fold difference in  $\text{Cl}^-$  and  $\text{OCN}^-$  block characteristic of WT channels is almost eliminated for E88Q channels, which display only  $\sim$ 4-fold difference in  $\text{Cl}^-$  and  $\text{OCN}^-$  affinity (Figure 4F, Supplementary Figure 8, Supplementary Table 2). This effect is almost entirely due to 10-fold less potent block of E88Q by  $\text{OCN}^-$ . Qualitatively similar results were obtained for  $\text{SCN}^-$  block of randomly oriented WT and E88Q channels (Supplementary Figure 10). Even if we are cautious in quantifying the effect because  $\text{Cl}^-$  block cannot be measured to saturation, a qualitative reading of these experiments suggests that Glu88 contributes to anion recognition at the end of the pore defined by the T-E-Y triad.

## Discussion

### *The vestibule end of the pore*

In this work, we fuse electrophysiology, X-ray crystallography, and liposome flux assays to identify the routes by which fluoride ions access the previously identified fluoride binding sites along the polar track of Fluc homologues Fluc-Bpe and Fluc-Ec2. One anion binding site, identified by the anomalous diffraction of  $\text{Br}^-$  in the Fluc-Ec2 homologue, is located at the bottom of the electropositive vestibule and is sensitive to mutagenesis as well as modification of a nearby sidechain with the bulky thiol-reactive anion MTSES. Moreover, conversion of a serine

from this anion binding site to a cysteine introduces a strong pH-dependence to the fluoride channel activity, demonstrating that this position comprises part of the permeation pathway. Ion accumulation in aqueous entryways is a well-characterized feature of many ion channels, serving to increase the rate at which ions process to the constricted selectivity filter [17-19].

We speculate that the vestibule serine (S81 in Fluc-Ec2/S83 in Fluc-Bpe), which is absolutely invariant in Fluc channels, plays a central role in fluoride access to the dehydrated polar track. It is worth noting that a rotamerization of the vestibule serine would bring this sidechain within hydrogen bonding distance of one such polar track fluoride position, F1 (Figure 5). A mechanism involving translocation of fluoride ions by rotamerization of amino acid sidechains lining the pore has been proposed for the Fluc channels previously, and would be consistent with the measured conductance of these proteins[5]. Since threonine enjoys less conformational flexibility than serine, such a mechanism might explain why S81T is non-functional in Fluc-Ec2, and why the Ser to Thr substitution has not arisen over evolutionary time in any Fluc channel. The hydrogen bond between the fluoride and the vestibule serine seems to be dispensable, and mutant channels with an alanine at the position retain robust fluoride currents. Similarly, conversion of polar track residues to alanine also had mild consequences for Fluc-Ec2[11]. We note that, in experiments to monitor fluoride currents, especially single channels, saturating fluoride concentrations and high potentials are required due to the channels' relatively low conductance. We speculate that these mutants might have more drastic consequences at the low mM fluoride concentrations typical in the biological context.

#### *The T-E-Y triad end of the pore*

Based on sequence analysis and site-directed mutagenesis, we have also identified the opposite end of the pore, which, in Fluc-Bpe, is defined by a hydrogen-bonded trio of conserved sidechains, T39, Y104, and E88, contributed by each of the three pore-lining helices. We propose that, in the resting state of the channel, the E88 carboxylate resides in the position observed in the crystal structures (in structures, this position is additionally enforced by monobody binding). E88 is stabilized in this position by the positive dipole of helix 3b and hydrogen bond donors T39 and Y104, where it helps compensate the otherwise positive electrostatics of the unoccupied channel. We suggest that when F<sup>-</sup> is present, the permeant anion electrostatically repels the carboxylate, perhaps competing for the same binding site at the top of helix 3b.

Other anions are also able to compete for this site in the permeation pathway, competitively inhibiting fluoride currents when bound. We observed that, for a series of halides and pseudohalides, the selectivity series is correlated to the  $pK_a$  of the conjugate acid (Supplementary Table 3, Supplementary Figure 7); we propose that  $pK_a$  is actually a proxy for the anion's strength as a hydrogen bond acceptor (basicity). Although  $pK_a$  and basicity are not strictly correlated across anion types, the properties are relatively well correlated within a single anionic series, such as the halide/pseudohalide series tested here[20,21]. Thus, we suggest that an anion's propensity to serve as a hydrogen bond acceptor contributes to its recognition by the Flucs, helping to explain the channel's remarkable indifference to  $Cl^-$ , the fluoride ion's most biologically relevant competitor. In contrast to  $Cl^-$ , and like  $OCN^-$ ,  $F^-$  is a famously strong hydrogen bond acceptor.

#### *Proposed mechanism of fluoride permeation*

For all of Fluc's idiosyncrasies, we propose a mechanism with much in common with other well-characterized ion channels (Figure 5). The negative charge of the fluoride ions is counterbalanced by the protein's few positive charges, the vestibule arginines and the structural central  $Na^+$ . Experiments have shown that both pores are functional for  $F^-$  permeation[6], but it seems highly unlikely that all six anion positions (three anions in each of two pores) are simultaneously occupied. Rather, we imagine a scenario of alternating occupancy, as proposed for other multi-ion pores, in which a fluoride moving into one binding site electrostatically hastens its neighbor into the next position in the sequence. We propose that the densities observed in the crystal structure either represent partially occupied fluoride sites, or that the monobodies used as crystallization chaperones alter the electrostatic landscape in the pore, increasing ion occupancy. Indeed, in crystal structures of Fluc-Bpe with monobody occupying only one side of the channel, each pore contained only one fluoride density, rather than two, in the polar track[10].

In panel 5A, the starting configuration shows a  $F^-$  bound in the site identified by anomalous scattering, at the bottom of the vestibule, labelled F0. We propose that as additional fluoride ions enter the electropositive vestibule, the fluoride ion at F0 is electrostatically repelled, providing energy for desolvation and translocation into the narrowest part of the channel at position F1. But the F1 binding site is not pre-assembled: rotamerization of the vestibule serine (S83 in Fluc-Bpe), which is possible with serine but not threonine, accompanies the lateral

movement of the anion. Other sidechains have also been proposed to adopt new rotameric conformations in order to ligand the anion at F1, including N43[5] and S84[11]. Thus, we propose that the F1 binding site is assembled simultaneously with its occupation by fluoride. The rotamerization of channel sidechains to accompany ions through the pore has been proposed for other channels as well, including the Orai and voltage-gated calcium channels[22,23].

We imagine that this configuration is short-lived: a new fluoride ion can settle into the deep vestibule F0 site, the fluoride at F1 moves farther down the channel to F2, and the S83 sidechain returns to its position facing the vestibule. The binding site at F2 is in close proximity to the E88 carboxylate; the electrostatic conflict could be resolved if E88 swings out into solution, allowing the fluoride at F2 to exit the channel, having now traversed the bilayer (whereby E88 could then resume its position at the pore exit without conflict). We show that the E88Q mutant reduces both fluoride currents and block of fluoride currents by  $\text{OCN}^-$ . We propose that both behaviors arise because the mutant sidechain, which does not bear a negative charge, is not as easily dislodged from the binding site via electrostatic conflicts with the permeant fluoride or the cyanate blocker.

This proposed mechanism introduces several previously unrecognized amino acids involved in fluoride permeation, and extends the pathway to the aqueous solutions on both sides of the bilayer. It also explains the evolutionary conservation and physiological consequences of mutation for several sidechains, including S83 and E88. And while these experiments provide the first hints of a molecular mechanism for anion recognition by the Flucs, they also emphasize how robust the channel's anion selectivity is. Despite dozens of point mutations to two homologues, alone and in combination (summarized in Supplementary Figure 11), no mutant that permits the permeation of any other anion has been reported yet. It may be that there is no unique selectivity filter, but that several regions of the channel work together to achieve selectivity, so that abolishing anion selectivity requires destruction of the channel itself. Alternatively, channel selectivity might be achieved by matching the number of available ligands in the pore to the preferred coordination number of the anion, as has been proposed for  $\text{K}^+$  channels[24,25].  $\text{F}^-$  is a superlative in this regard, requiring fewer ligands than any other anion. If this is the case, relaxing the selectivity might require adding coordinating ligands along the pore, which would be difficult to accomplish with site-directed mutagenesis alone. Indeed, even accounting for the addition of coordinating ligands via sidechain rotamerization, the F1 and F2



sites have relatively small coordination numbers (~4 including the phenylalanine ring edges). Chloride, in contrast prefers at least 6 ligands in its coordination sphere[25-28].

As a rare example of an anion channel required to select against the biologically dominant anion, the Fluc channels present an excellent case study of biochemical anion recognition. But the Fluc channel's stringent anion recognition, as quantified here, is physiologically essential, too. In electrophysiology experiments, in the presence of saturating 300 mM F<sup>-</sup>, the apparent K<sub>i</sub> values for block by Cl<sup>-</sup> and other anions are correspondingly low. But in the bacterial cytoplasm during a F<sup>-</sup> challenge, with F<sup>-</sup> ion between 100 μM and 10 mM[2], and Cl<sup>-</sup> ion between 10 and 100 mM[29], even a small increase in the inhibitory effects of Cl<sup>-</sup> would represent a serious challenge to the efficacy of these channels and the survival of the bacteria.

## **Materials and Methods:**

### *Chemicals and Reagents:*

Potassium isethionate was prepared from isethionic acid (Wako Chemicals, Richmond, VA). Detergents were from Anatrace and lipids from Avanti Polar Lipids. MTSES ((2-sulfonatoethyl)methanethiosulfonate) was from Toronto Research Chemicals.

### *Protein expression, purification, and reconstitution:*

Mutant channels were constructed using standard molecular biology techniques and verified by sequencing. Histidine-tagged Fluc-Bpe and Fluc-Ec2 were expressed in *E. coli* and purified via cobalt affinity chromatography according to published protocols[3,5,10]. The buffer for the final size exclusion step was 100 mM NaBr, 10 mM 2-[4-(2-hydroxyethyl)piperazin-1-yl]ethanesulfonic acid (HEPES), pH 7 for crystallography applications, or 100 mM NaCl, 10 mM HEPES pH 7 for functional reconstitution. For reconstitution, proteins were mixed with detergent-solubilized *E. coli* polar lipids (Avanti Polar Lipids, 10 mg/mL) at a ratio of 0.1 μg protein/mg lipid for single channel bilayer electrophysiology, 0.2 μg protein/mg lipid for liposome flux experiments, or 5 μg protein/mg lipid for macroscopic bilayer experiments. The protein/detergent/lipid mixture was dialyzed for 36 hours (6 L buffer per 50 mg lipid over 3 buffer changes). Proteoliposomes were stored at -80 °C until use, at which point the suspension was freeze/thawed three times and extruded 21 times through a 400 nm filter to form liposomes.

### *X-ray crystallography:*



After purification, monobody S9 and Fluc-Ec2 were mixed in a 1:1 molar ratio as described[5]. The protein mixture was used to set up sitting drop vapor diffusion crystal trays with a 1:1 mixture of protein solution and mother liquor. Crystals formed in either 0.1 M glycine, pH 8.7-9.2, 31-36% PEG 600 or 0.1 M ammonium sulfate, 0.1 M N-(2-Acetamido)iminoacetate (ADA) pH 6-6.5, 31-36% PEG 600 over 3-7 days, and were frozen in liquid nitrogen prior to data collection at 13.5 keV at the Life Sciences Collaborative Access Team beamline 21-ID-D at the Advanced Photon Source, Argonne National Laboratory. Phases were calculated by molecular replacement with Phaser[30] using Fluc-Ec2 and the monobody S9 as search models (pdb:5A43), followed by refinement with Refmac[31] and Phenix[32] and model building in real space with Coot[33].

*Planar lipid bilayer electrophysiology:*

Experiments were performed as described previously[4]. Electrophysiological recordings were acquired at a holding voltage of -200 mV, electronically filtered at 1 kHz during acquisition and digitally filtered to 500 Hz for analysis. Solutions in the *cis* and *trans* chambers varied as described in the text. Typical solutions contained 300 mM NaF with 10 mM 3-morpholinopropane-1-sulfonic acid (MOPS), pH 7. For MTSES and anion block experiments, the sodium salt of each anion was prepared as a concentrated solution in 300 mM NaF and 10 mM MOPS pH 7 and added to the *cis* chamber to the indicated final concentration with thorough mixing. For experiments in which the pH was varied, recording buffers additionally contained 10 mM 2-(N-morpholino)ethanesulfonic acid (MES, for pH 5.5 experiments) or 10 mM glycine (for pH 9 experiments). A pre-determined aliquot of dilute isethionic acid or NaOH was added to adjust the pH in the *cis* chamber, and the final pH value was confirmed after each experiment. Macroscopic bilayer recordings shown are representative of 3-7 independent bilayer experiments, and single channel experiments are representative of at least 10 independent recordings for each mutant. All electrophysiology data was derived from at least two independent protein preparations.

*Fluoride efflux from liposomes:*

Fluoride efflux from liposomes was monitored using a fluoride-selective electrode as described previously[34]. Intraliposomal solution contained 300 mM KF, 10 mM Na<sup>+</sup> isethionate, 10 mM HEPES-KOH, pH 7. The external solution was exchanged by passing liposomes over a Sephadex G-50 spin column equilibrated in 300 mM K<sup>+</sup> isethionate, 10 mM Na isethionate, 10

mM HEPES-KOH, pH 7. Proteoliposomes were diluted 20-fold in matching buffer and fluoride efflux initiated by addition of 1  $\mu$ M valinomycin. At the end of the experiment, remaining encapsulated fluoride was released from the liposomes by addition of 50 mM n-octyl- $\beta$ -D-glucoside. Fluoride efflux was normalized against total encapsulated fluoride. All experiments were performed as technical triplicates of two independent protein preparations, and the traces shown are representative. Light scattering experiments (Figure S9) were performed as previously described[35]. Proteoliposomes containing 300 mM KF, KCl, or KOCN and 10 mM HEPES pH 7 were diluted in assay buffer (300 mM K<sup>+</sup> isethionate, 10 HEPES pH 7). 90° light scattering was monitored at 550 nm upon addition of valinomycin (0.1  $\mu$ g/mL final concentration).

### **Contributions**

B.C.M. conceived this work; performed experiments; analyzed data; prepared figures; and wrote the original draft of the manuscript. R.G. and B.B.K. performed experiments. R.B.S. conceived, directed, and supervised all aspects of this work, analyzed data, prepared figures, and wrote the original draft of the manuscript.

### **Acknowledgements**

We thank the LS-CAT beamline staff for technical assistance, Christian Macdonald for assistance with sequence analysis, and members of the Stockbridge lab for comments on the manuscript and project. We are grateful to José Faraldo-Gomez and Robyn Stix (NIH/NHLBI) for insightful conversations about channel electrostatics.

### **Funding**

This work was supported by National Institutes of Health grants R35-GM128768 to RBS and resources of the Advanced Photon Source, a U.S. Department of Energy (DOE) Office of Science User Facility operated for the DOE Office of Science by Argonne National Laboratory under Contract No. DE-AC02-06CH11357. Use of the LS-CAT Sector 21 was supported by the Michigan Economic Development Corporation and the Michigan Technology Tri-Corridor (Grant 085P1000817).

### **Competing interests**

The authors declare no competing interests.

### **Data availability**

Atomic coordinates for the Fluc-Ec2 and mutants in the presence of Br<sup>-</sup> have been deposited in the Protein Data Bank under accession numbers 7KKR (WT); 7KKA (S81A); 7KKB (S81C); 7KK8 (S81T); 7KK9 (S81A/T81A). Other data and materials are available upon request. No custom code was used.

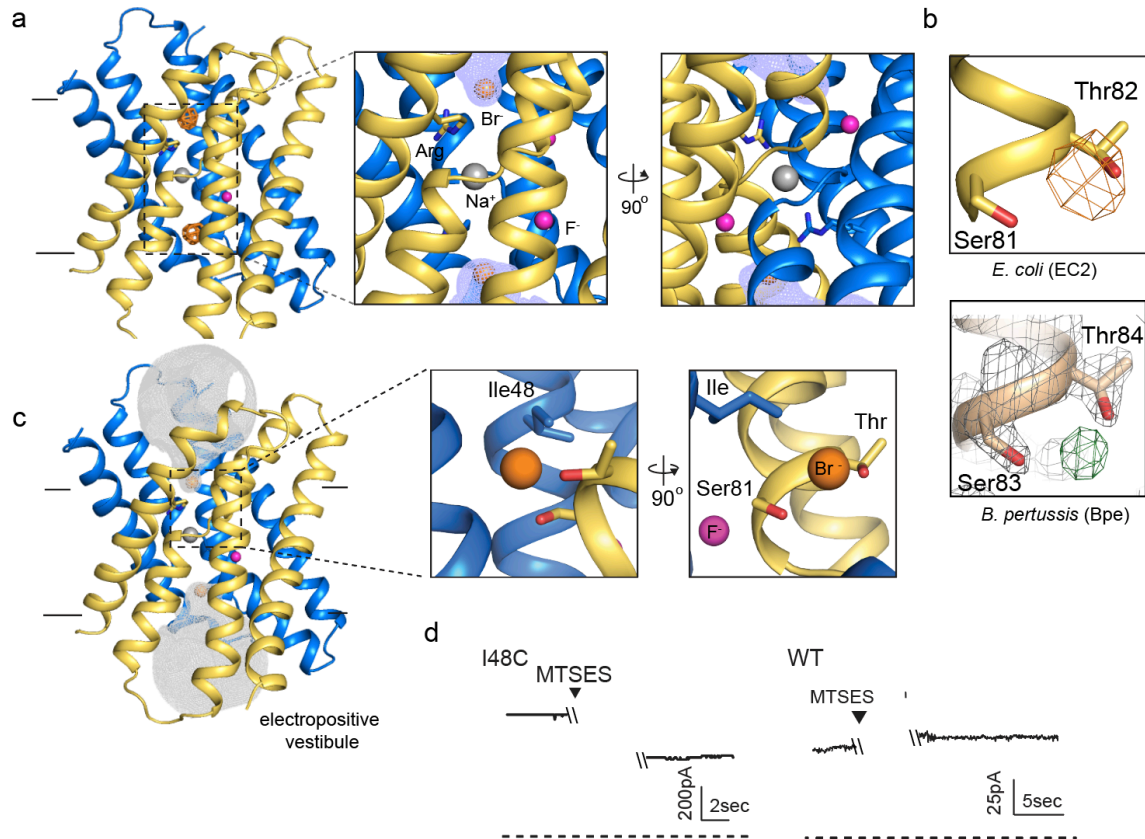

**Figure 1. An anion binding site in the Fluc channel vestibule.** A. Structure of Fluc-Ec2 with Br<sup>-</sup>. Monomers are shown in maize and blue, with fluoride ions as pink spheres, sodium as a gray sphere, and anomalous difference map shown as orange mesh, contoured at 5  $\sigma$ . Zoomed-in views depict Br<sup>-</sup> as orange spheres, with aqueous vestibule indicated by blue mesh, and vestibule arginines shown as sticks. B. Comparison of vestibule anion binding site for Fluc-Ec2 (top) and Fluc-Bpe (bottom; PDB: 5NKQ). For Fluc-Ec2, the Br<sup>-</sup> anomalous difference map is displayed as orange mesh and contoured at 5  $\sigma$ . For Fluc-Bpe, the F<sub>o</sub>-F<sub>c</sub> map is displayed as green and contoured at 3  $\sigma$ . 2F<sub>o</sub>-F<sub>c</sub> electron density is shown for sidechains and displayed as grey mesh, contoured at 2  $\sigma$ . C. Additional views of the Br<sup>-</sup> binding site in Fluc-Ec2, with Ile48, Ser81, and Thr82 shown as sticks. D. Electrical recordings for multichannel bilayers of Fluc-Ec2 I48C and WT Fluc-Ec2. Dashed line indicates zero current level. 1 mM MTSES was added at the indicated timepoint. Traces are representative of data collected from 5 independent bilayers.

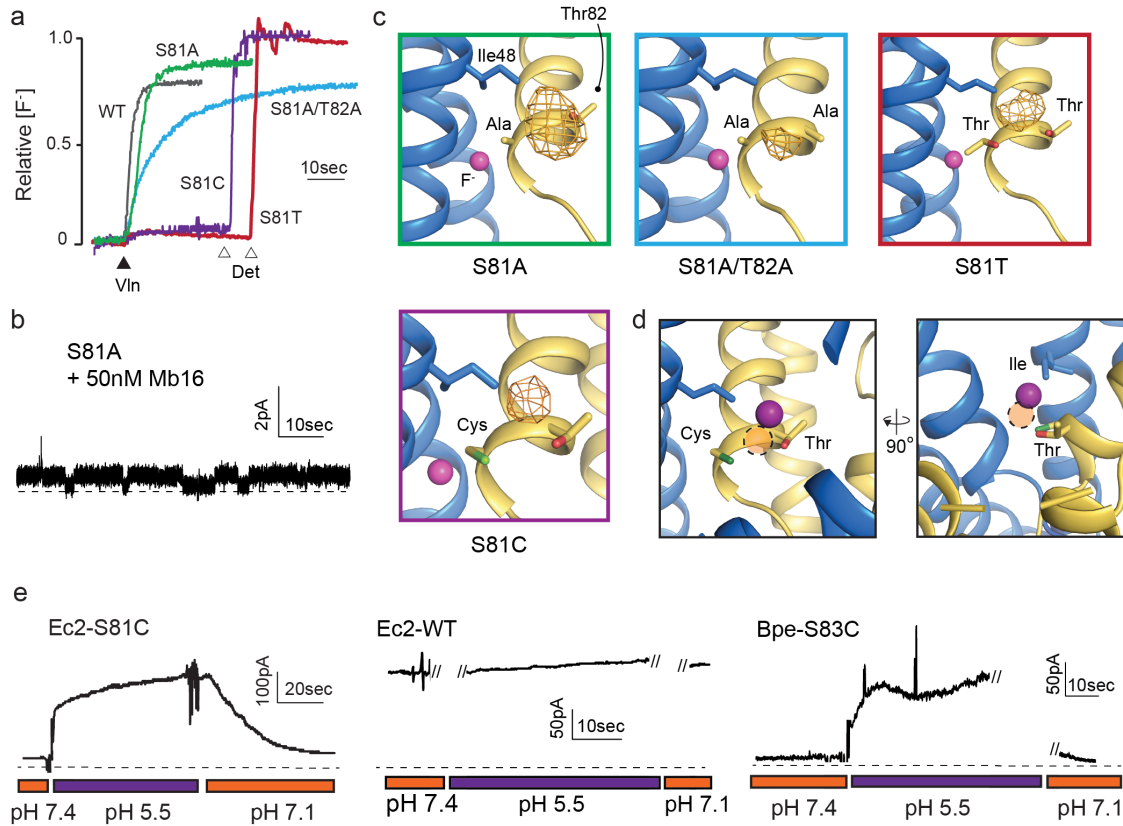

**Figure 2. Mutagenesis of vestibule anion binding site.** A. Fluoride efflux from liposomes monitored with a fluoride-selective electrode: WT Fluc-Ec2 (grey), S81A (green), S81A/T82A (blue), S81T (red), and S81C (purple). Efflux initiated by the addition of valinomycin (black triangle). After reaching steady state, remaining encapsulated fluoride was released by detergent addition (open triangles). Each trace is normalized against total encapsulated fluoride. Traces are representative of experiments performed as technical triplicates of biological duplicates. B. Representative single channel recording of S81A in the presence of blocking monobody to identify the zero-current level (dashed line). C. Bromine anomalous difference maps of S81A, S81A/T82A, S81T, and S81C contoured at  $5\sigma$ . The frame around each panel is colored as in panel A. D. Comparison of the position of the Br<sup>-</sup> density in S81C (purple sphere) and WT Ec2 (dashed orange circle). E. Electrical recordings of fluoride currents mediated by Ec2-S81C, WT Ec2, and Bpe-S83C channels. pH was adjusted during the experiment as indicated. Traces are representative of recordings from 3 independent bilayers.

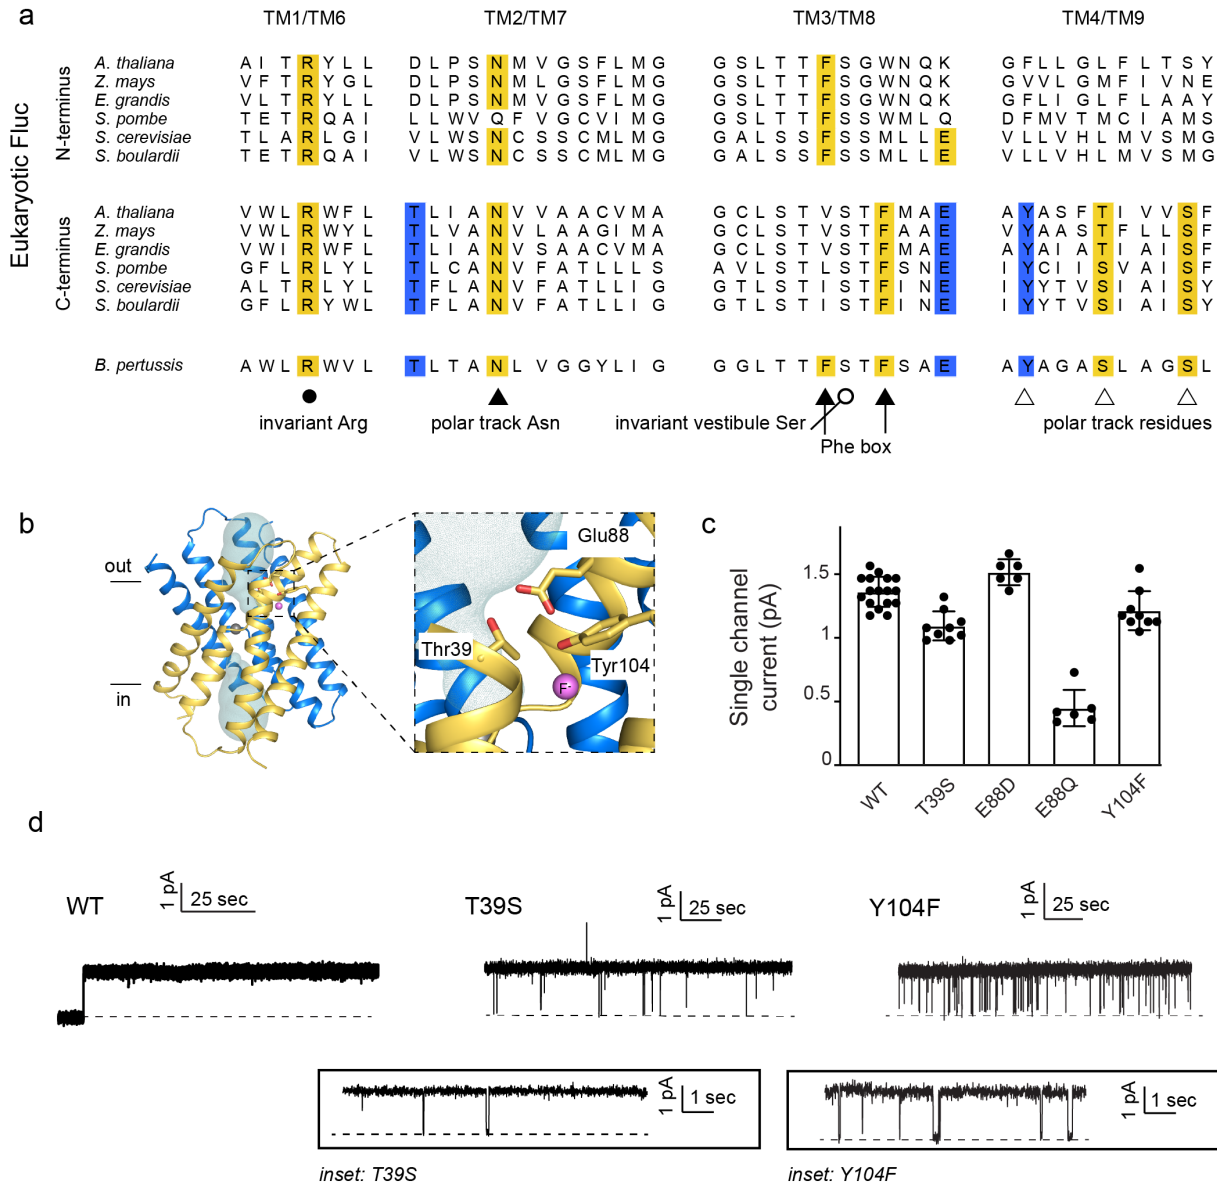

**Figure 3. Identification and characterization of triad residues.** A. Sequence alignment of Fluc-Bpe with N- and C-terminal domains or representative eukaryotic fluoride channels. Conserved residues shown in yellow. Residues highlighted in blue were identified for further investigation. B. Structure of Fluc-Bpe (PDB: 5NKQ) with triad residues indicated as sticks, aqueous vestibule as mesh, and fluoride ions as pink spheres. C. Single channel currents for WT Fluc-Bpe and indicated mutants at a holding voltage of 200 mV. Error bars represent the mean and SEM of multiple single channels, shown as individual points. Measurements were performed with channels from at least two different protein preparations. D. Representative single channel electrophysiological recordings for WT Fluc-Bpe and indicated mutants.

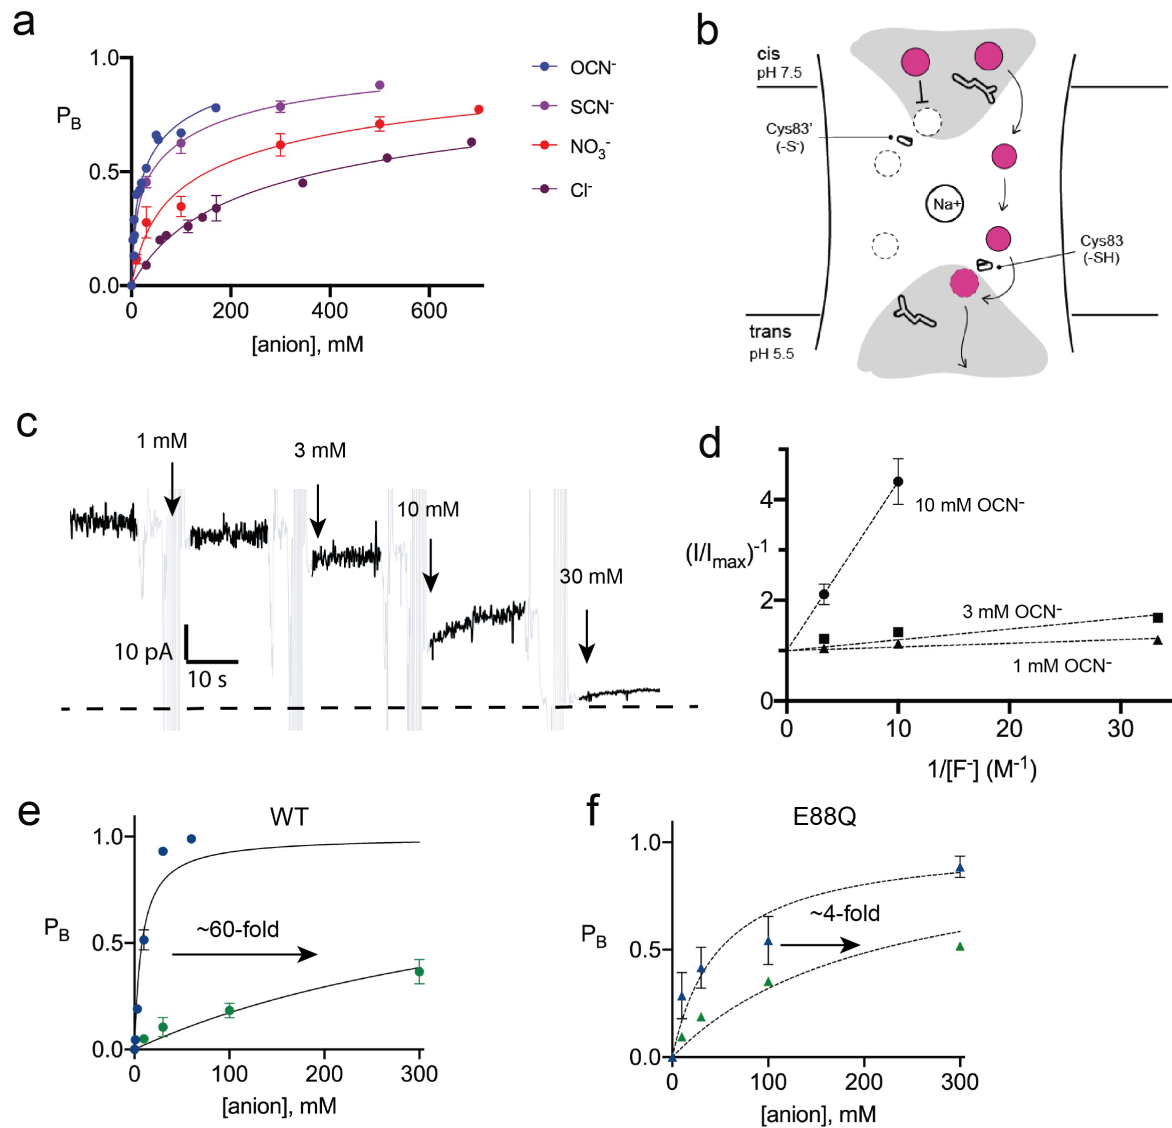

**Figure 4. Inhibition of Fluc-Bpe and Fluc-Bpe E88Q currents by halides and pseudohalides.** A. Fraction of blocked current as a function of anion addition. The solid lines represent fits to a 2-site binding isotherm, constrained so that the maximum  $P_B$  for each site is 0.5. In this model, anions bind to single sites that are located on opposite sides of the dual topology pores.  $K_i$  values for fits are reported in Supplementary Table 1. Data collected from three independent bilayers. Where present, error bars represent SEM of independent replicates. B. Cartoon of oriented Bpe channels for anion block experiments. Gray area indicates aqueous vestibules. Sidechains E88 and S83C are shown as sticks. C. Representative electrical recording showing OCN<sup>-</sup> addition to fluoride currents mediated by oriented Bpe S83C channels. The zero-current level is indicated with a dashed line. Cyanate additions are indicated by the arrows. Regions of the recording with electrical noise from cyanate addition and mixing are colored light gray to assist with figure interpretation. D. Lineweaver-Burke analysis of OCN<sup>-</sup> block as a



function of  $F^-$  concentration. Dashed lines represent linear fits to the data. All measurements performed in triplicate from independent bilayers; where not visible, error bars are smaller than the diameter of the point. E-F. Fraction of blocked current in S83C (E) or S83C/E88Q (F) oriented channels as a function of anion addition. Points and error bars represent the mean and SEM from three independent bilayers. Where not visible, error bars are smaller than the diameter of the point. Solid lines represent fits to single-site binding isotherm with  $P_{B,max} = 1$ .  $K_i$  values from fits reported in Supplementary Table 2.



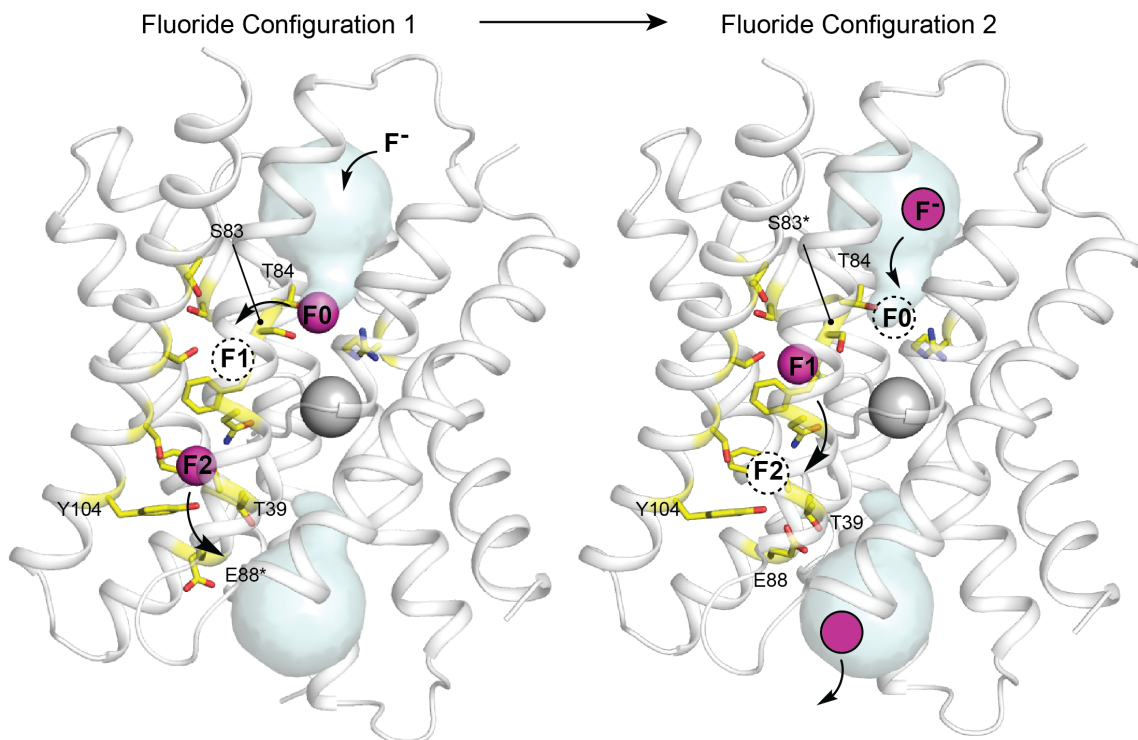

**Figure 5. Proposed multi-ion permeation mechanism for Fluc-Bpe.** For simplicity, only one pore is shown. Cartoon structure is shown in transparent gray, aqueous vestibules are shown as pale cyan surfaces, and residues that have been shown to contribute to the pore (this work, and references [5,6,10,11]) are shown as yellow sticks. The five residues identified in this work are labelled. Asterisks indicate that the rotamer shown is hypothetical and has not been observed crystallographically. Occupied fluoride ion sites are shown in pink, unoccupied fluoride binding sites are shown as dashed circles, and the proposed movement of ions between binding sites is indicated with arrows.

|       | P4 <sub>i</sub>      | P4 <sub>i</sub>    | P4 <sub>i</sub>    | P4 <sub>i</sub>    | P4 <sub>i</sub>    | P4 <sub>i</sub> |
|-------|----------------------|--------------------|--------------------|--------------------|--------------------|-----------------|
|       | 87.6, 87.6, 144      | 87.4, 87.4, 141.9  | 87.2, 87.2, 142.7  | 87.5, 87.5, 147.4  | 87.1, 87.1, 145.2  |                 |
|       | 90, 90, 90           | 90, 90, 90         | 90, 90, 90         | 90, 90, 90         | 90, 90, 90         |                 |
|       | 34.4-3.11 (3.3-3.11) | 39.1-2.5 (2.6-2.5) | 46.7-2.9 (3.0-2.9) | 41.9-3.1 (3.3-3.1) | 28.4-2.7 (2.8-2.7) |                 |
|       | 0.491 (2.31)         | 0.140 (1.846)      | 0.363 (3.437)      | 0.723 (6.147)      | 0.217 (2.104)      |                 |
|       | 0.203 (0.938)        | 0.057 (0.742)      | 0.156 (1.434)      | 0.290 (2.446)      | 0.088 (0.833)      |                 |
|       | 7.2 (2.0)            | 11.9 (1.7)         | 9.8 (2.5)          | 8.5 (2.1)          | 10.3 (2.0)         |                 |
|       | .996 (0.61)          | .998 (0.61)        | 0.98 (0.59)        | .998 (0.73)        | .998 (0.71)        |                 |
|       | 99.76 (100)          | 99.5 (100)         | 99.82 (100)        | 99.85 (99.95)      | 99.8 (100)         |                 |
|       | 13.3 (13.9)          | 13.7 (14.1)        | 12.5 (13.0)        | 13.6 (14.0)        | 13.8 (14.4)        |                 |
|       | 33.3-3.11            | 37.68-2.5          | 46.65-2.9          | 39.11-3.1          | 28.28-2.7          |                 |
|       | 19,549               | 36,602             | 47,159             | 40,143             | 29,198             |                 |
|       | 24.6/29.6            | 23.0/26.3          | 23.2/29.3          | 24.2/27.7          | 22.6-27.6          |                 |
| ored  | 89.63                | 94.7               | 91.94              | 91.94              | 90.1               |                 |
| liers | 0                    | 0.46               | 1.15               | 1.84               | 3.3                |                 |
| Å)    | 0.009                | 0.009              | 0.009              | 0.011              | 0.009              |                 |
| )     | 1.188                | 1.12               | 1.06               | 1.36               | 1.05               |                 |
|       | 7KKR                 | 7KKA               | 7KKB               | 7KK9               | 7KK8               |                 |

hest-resolution shell are shown in parenthesis. *r<sub>ms</sub>*, root-mean-square

**Supplementary Table 2. Fit parameters for anion block experiments.**

|                   | Dual topology channels |                     |                                 |                    | Oriented channels   |                    |                       |                      |
|-------------------|------------------------|---------------------|---------------------------------|--------------------|---------------------|--------------------|-----------------------|----------------------|
|                   | WT/OCN <sup>-</sup>    | WT/SCN <sup>-</sup> | WT/NO <sub>3</sub> <sup>-</sup> | WT/Cl <sup>-</sup> | WT/OCN <sup>-</sup> | WT/Cl <sup>-</sup> | E88Q/OCN <sup>-</sup> | E88Q/Cl <sup>-</sup> |
| K <sub>i,1</sub>  | 6.8 mM                 | 9.0 mM              | 45 mM                           | 137 mM             | 7.9 mM              | 480 mM             | 48.9 mM               | 213 mM               |
| B <sub>max1</sub> | 0.5                    | 0.5                 | 0.5                             | 0.5                | 1.0                 | 1.0                | 1.0                   | 1.0                  |
| K <sub>i,2</sub>  | 100 mM                 | 190 mM              | 530 mM                          | 1.1 M              | --                  | --                 | --                    | --                   |
| B <sub>max2</sub> | 0.5                    | 0.5                 | 0.5                             | 0.5                | --                  | --                 | --                    | --                   |

|                   | Dual topology channels |                      |
|-------------------|------------------------|----------------------|
|                   | E88Q/SCN <sup>-</sup>  | E88Q/Cl <sup>-</sup> |
| K <sub>i,1</sub>  | 398 mM                 | 542 mM               |
| B <sub>max1</sub> | 0.5                    | 0.5                  |
| K <sub>i,2</sub>  | 1.2 M                  | 5.8 M                |
| B <sub>max2</sub> | 0.5                    | 0.5                  |

**Supplementary Table 3. Fluc-Bpe inhibition and physical properties of halides and pseudohalides.**

|                              | $K_{i,1}$<br>(mM) | $K_{i,2}$<br>(mM) | $K_i$ (oriented<br>system, mM) | Radius<br>(Å) | $pK_a$ | $\Delta G_{hyd}$<br>(kcal/mol) | $\Delta G_{Born}$<br>(kcal/mol) | $\log K_{Cl-X}^*$ |
|------------------------------|-------------------|-------------------|--------------------------------|---------------|--------|--------------------------------|---------------------------------|-------------------|
| F <sup>-</sup>               | --                | --                | --                             | 1.33          | 3.2    | -112                           | -114                            | -1.5              |
| Cl <sup>-</sup>              | 137               | 1100              | 480                            | 1.81          | -7     | -83                            | -86                             | 0                 |
| NO <sub>3</sub> <sup>-</sup> | 45                | 530               | --                             | 1.99          | -1.3   | -73                            | -72                             | 1.9               |
| SCN <sup>-</sup>             | 9.0               | 190               | --                             | 2.49          | 1      | -69                            | -63                             | 3.23              |
| OCN <sup>-</sup>             | 6.8               | 107               | 7.9                            | 2.16          | 3.7    | -89                            | -72                             | 0.82              |

\*Relative anion partition coefficient between water and PVC membrane, a measurement that reflects the lyotropic (Hofmeister series), described in [36].

**Supplementary Figure 1. Fluoride efflux from Fluc-Bpe I50W (blue trace) or WT Fluc-Bpe channels (black trace) proteoliposomes.** The unitary fluoride transport rate determined from three independent replicates is  $760 \pm 105$  ions/s.

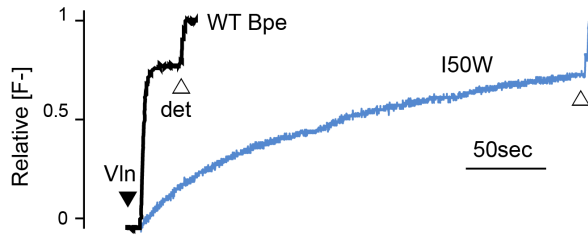

**Supplementary Figure 2. Chloride efflux experiments with fluoride-transporting Fluc-Ec2 S81A/T82A and the homologous Fluc-Bpe S83A/T84A (blue traces).** Representative traces from two independent protein preparations are shown. The background rate of chloride leak from empty liposomes is  $\sim 40 \text{ s}^{-1}$  (yellow traces).

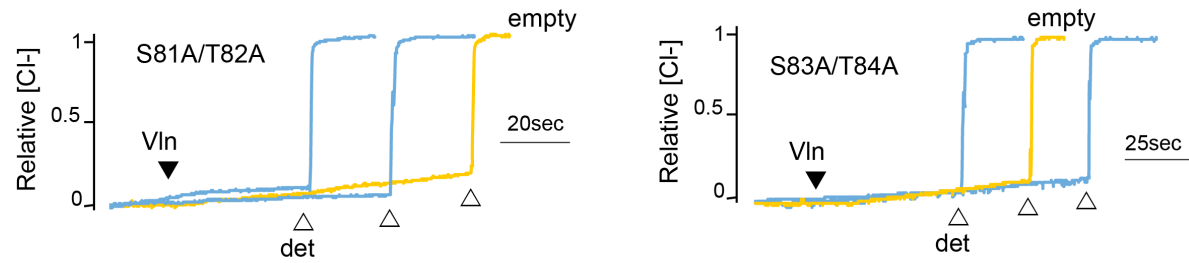

**Supplementary Figure 3. Fluoride efflux traces with indicated Fluc-Bpe mutants.** Fluoride dump is normalized against total fluoride in liposomes. In all traces, WT trace is shown in black, active mutants in blue, and inactive mutants in orange. Valinomycin addition indicated with the closed triangle and detergent addition with open triangles. Traces are representative of experiments from two independent protein preparations.

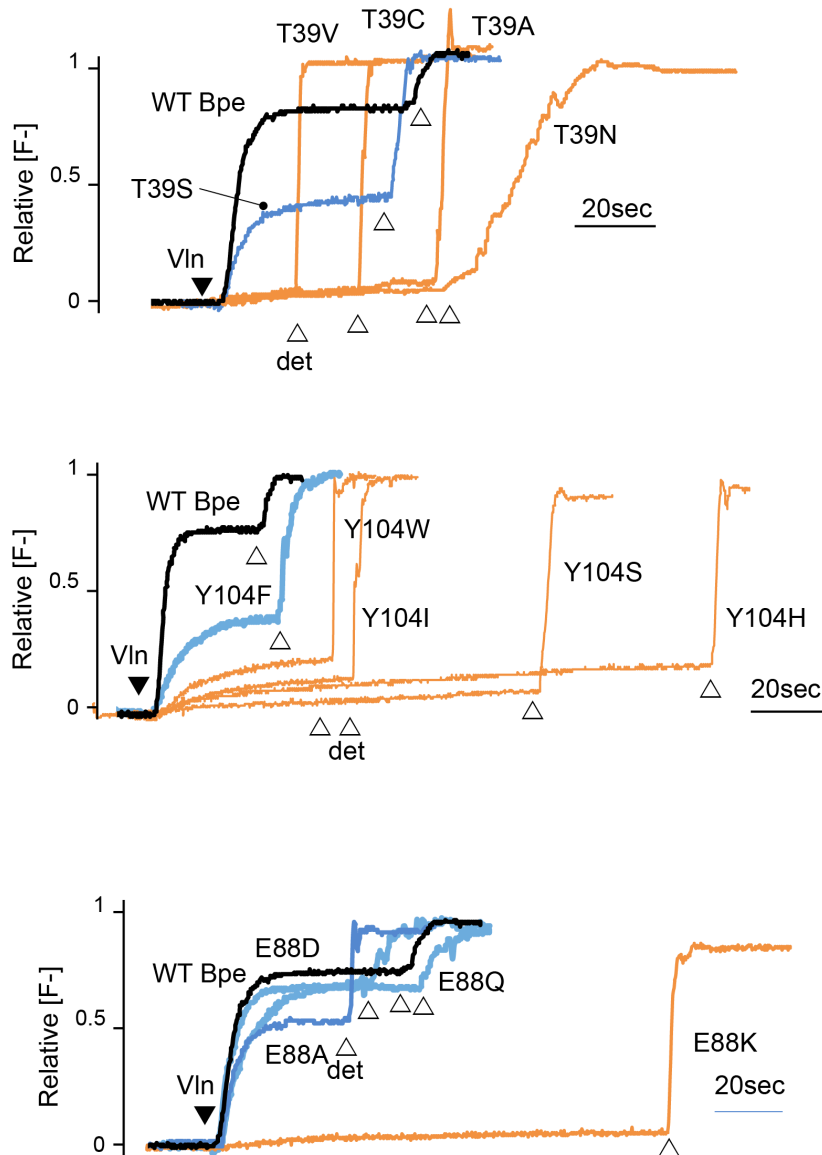

**Supplementary Figure 4. pH dependence of Fluc-Bpe E88 and E88Q.** Experiments were performed in the oriented system, S83C, with *trans* pH 5.5. The pH on the *cis* side was raised by stepwise replacement of pH 7 recording solution (buffered with MOPS) with recording solution buffered with glycine (pH 9). Points and error bars represent the mean and SEM from three independent bilayers. Representative recordings shown in lower panels.

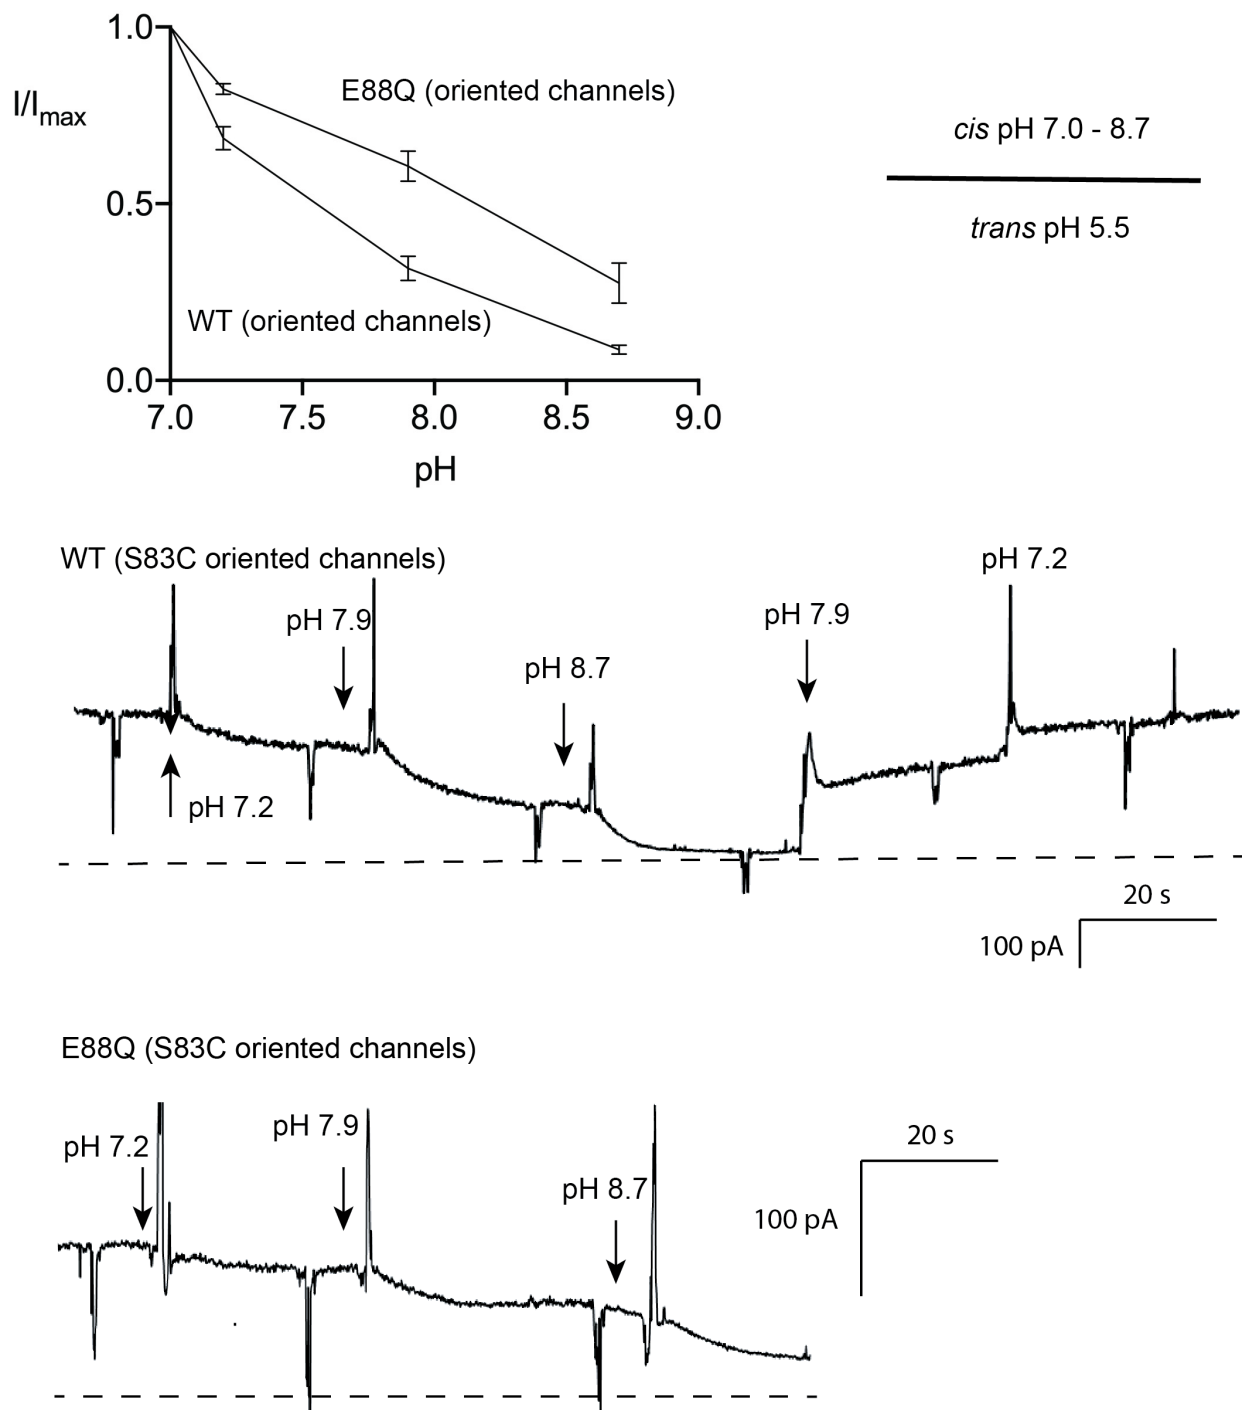



**Supplementary Figure 5. Monobody block of currents mediated by Fluc-Bpe mutants T39S and Y104F.** A. Fraction of T39S current blocked as a function of monobody L3 addition. Points and error bars represent the mean and SEM of measurements from three independent bilayers. The solid line represents a hyperbolic fit with a  $K_d$  value of 510 nM. For comparison, WT Fluc-Bpe is blocked by monobody L3 with a  $K_d$  value of 100 nM[3,8]. B. Fraction of T39S current blocked as a function of monobody S7 addition. Points and error bars represent the mean and SEM of measurements from four independent bilayers. The solid line represents a hyperbolic fit with a  $K_d$  value of 510 nM (it is entirely coincidental that this fit parameter is the same as for the data in panel A). For comparison, WT Fluc-Bpe is blocked by monobody S7 with a  $K_d$  value of 370 nM. The partial current block is typical of monobody S7 [3,5].

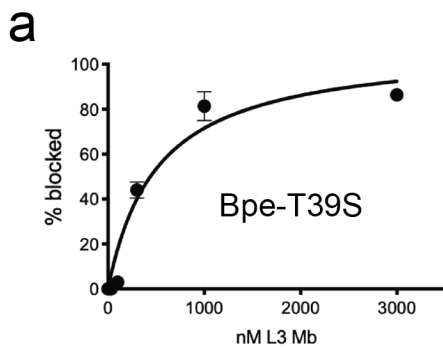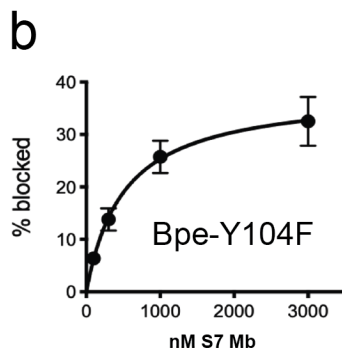

**Supplementary Figure 6. Chloride efflux experiments for fluoride-transporting Fluc-Bpe mutants Y104F, T39S, E88Q, and E88A.** Representative traces from two independent protein preparations are shown. The background rate of chloride leak from empty liposomes is  $\sim 40 \text{ s}^{-1}$  (yellow traces).

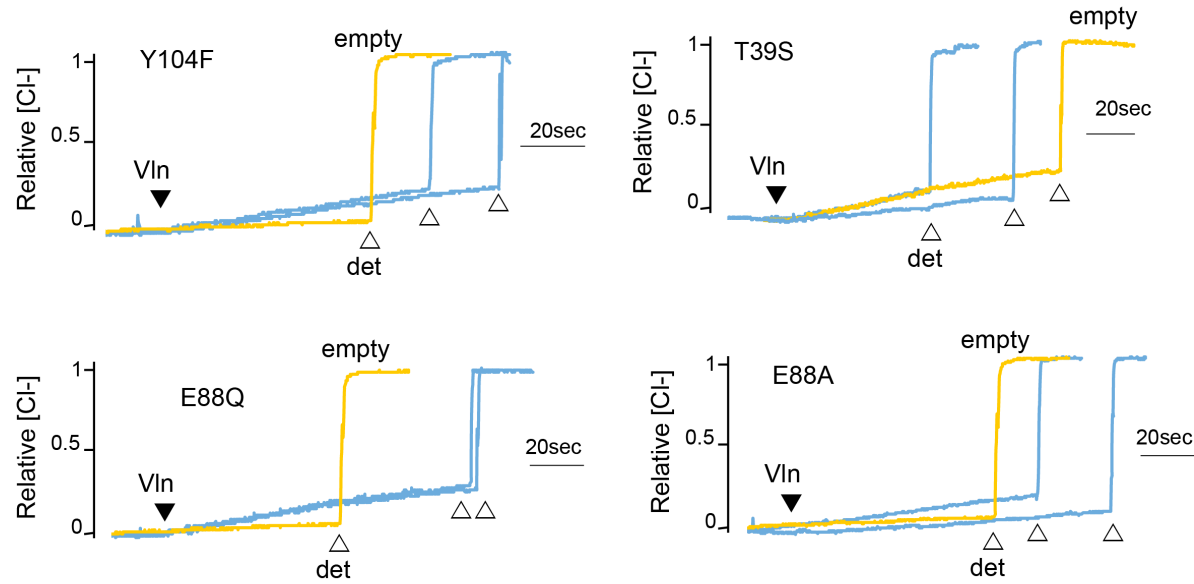

**Supplementary Figure 7. Halide and pseudohalide block of Fluc-Bpe.** a.  $K_{d1}$  for anion block, related to physical properties of the anions.  $K_{\text{partition, Cl-X}}$  describes the relative anion partition coefficient between water and PVC membrane, a measurement that reflects the lyotropic (Hofmeister series), described in [36]. All values are also reported in Supplementary Table 3.

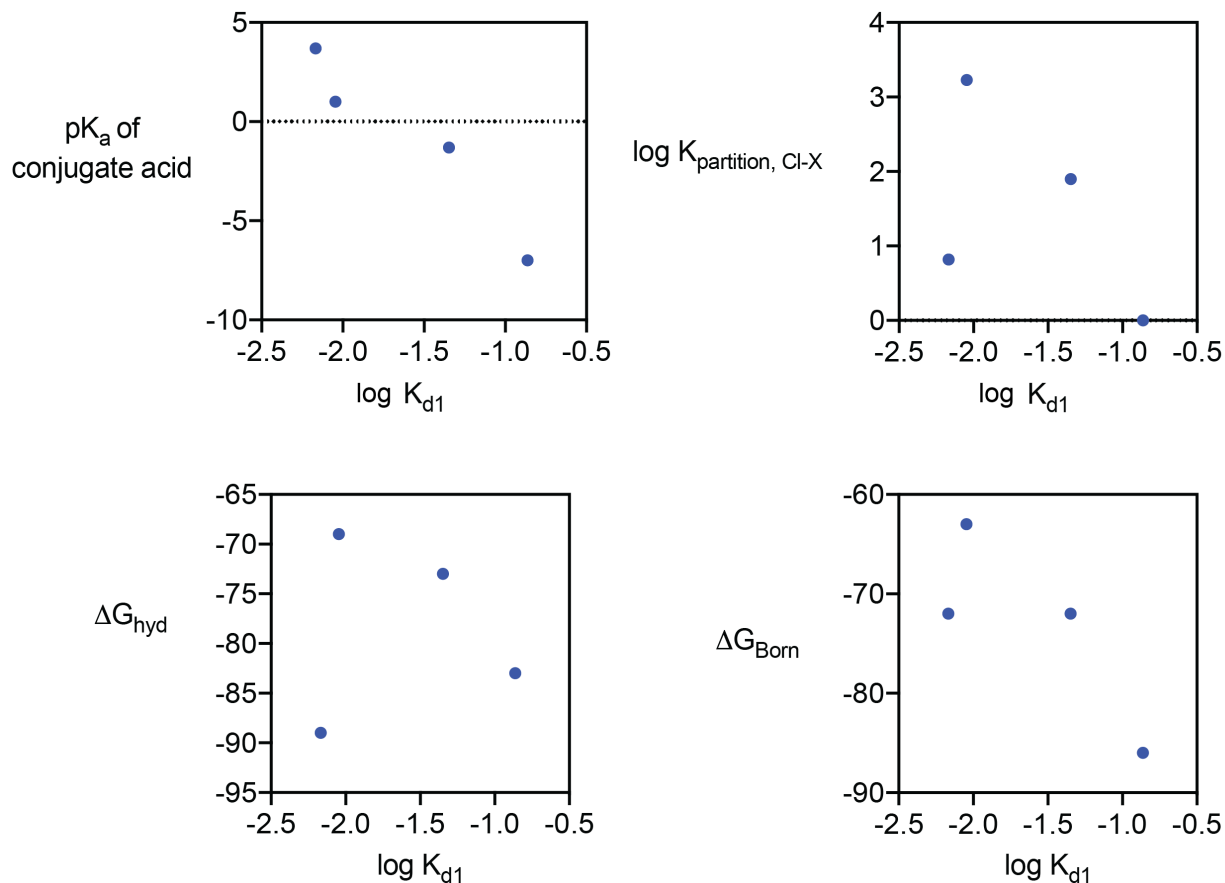

**Supplementary Figure 8. Representative fluoride current recordings with  $\text{OCN}^-$  and  $\text{Cl}^-$  titration.** Bilayers contain oriented S83C or S83C/E88Q channels. Zero current level is indicated by the dashed line.

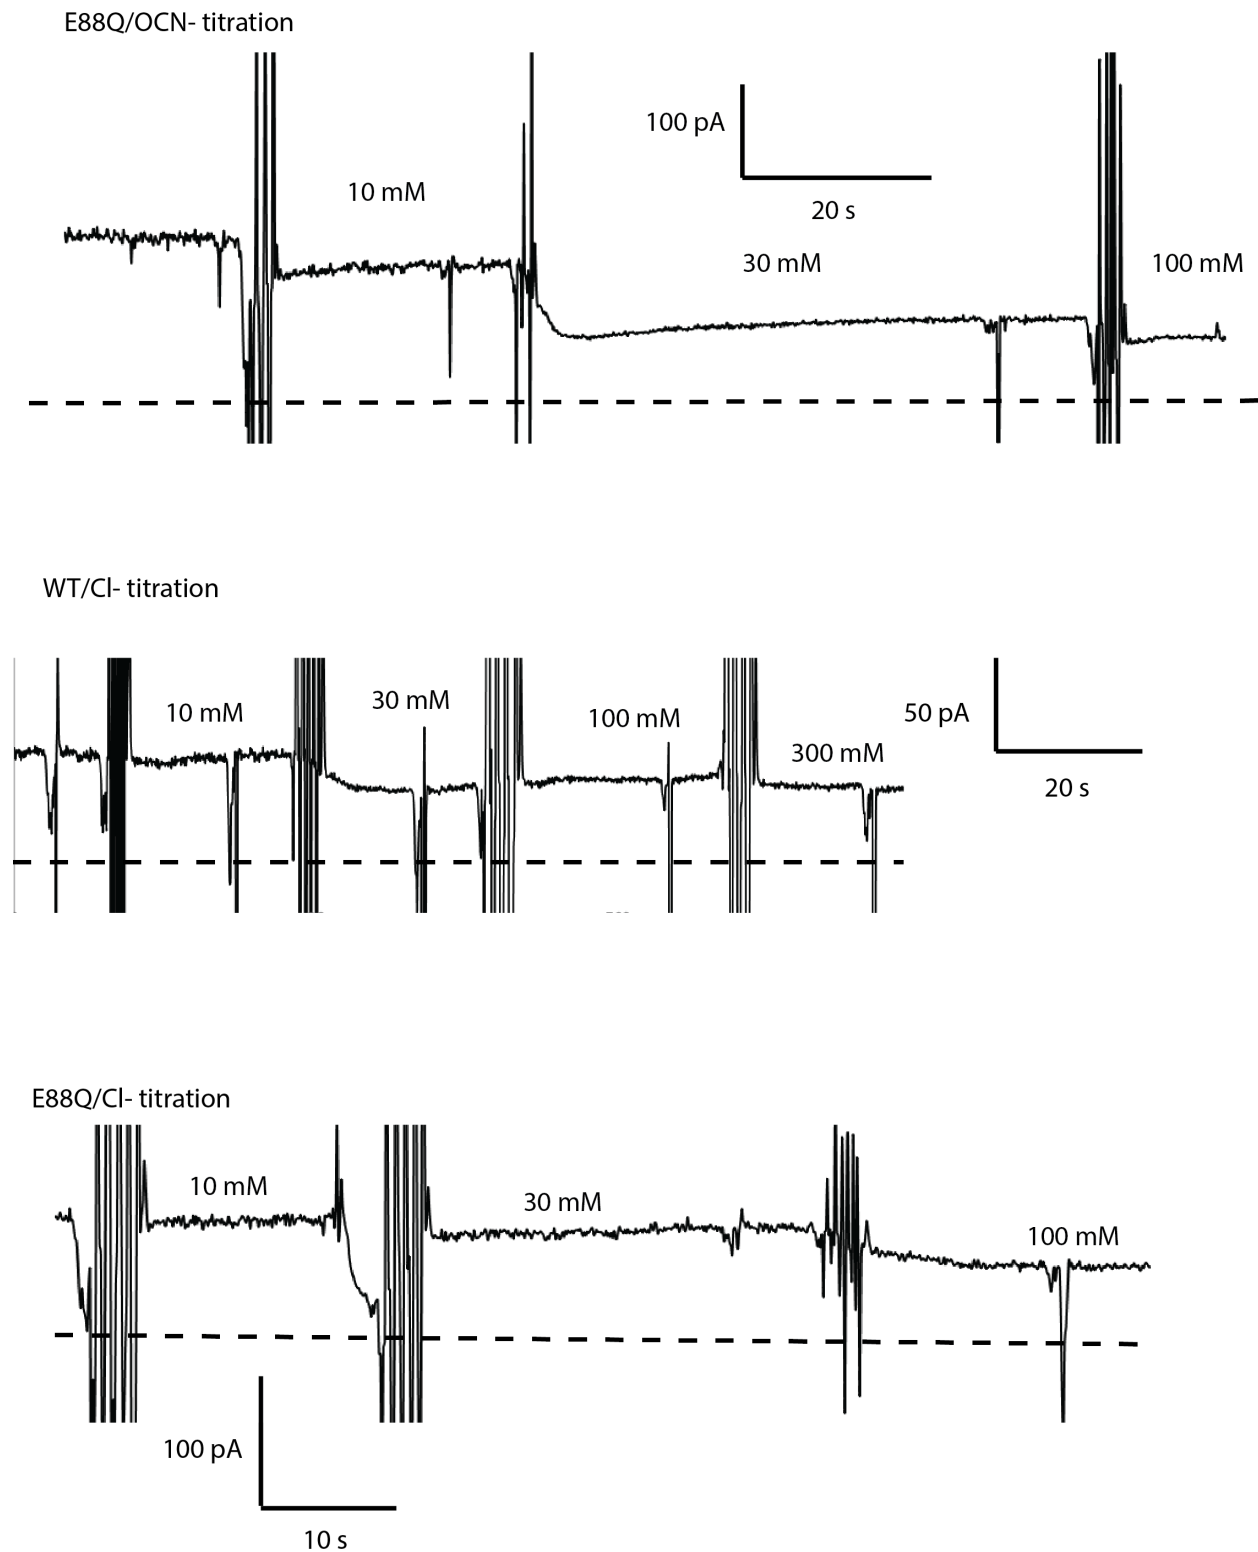

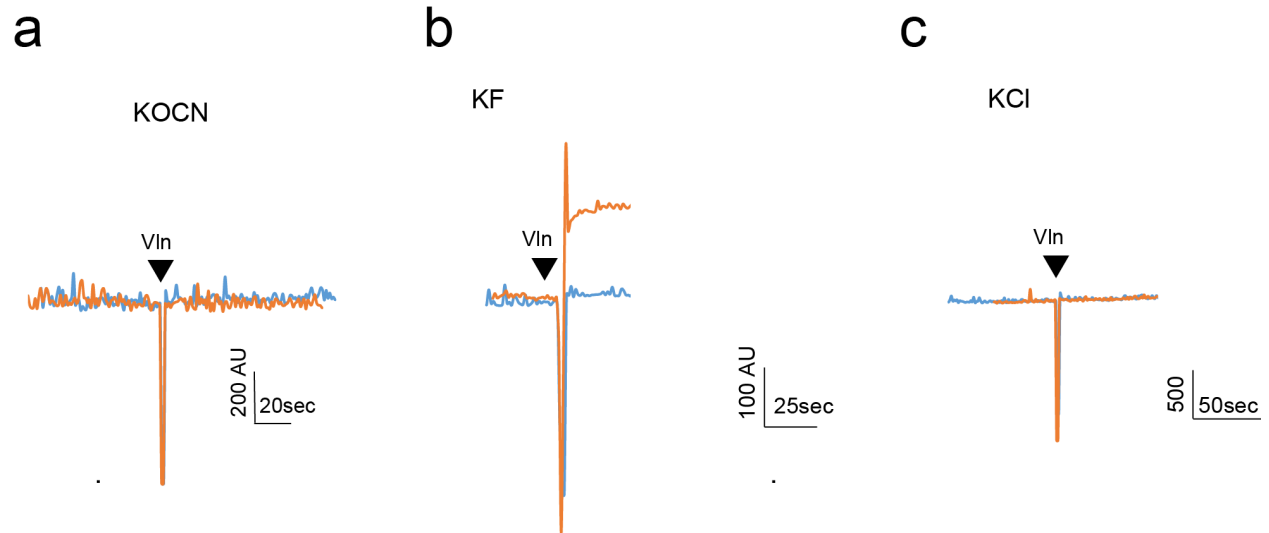

**Supplementary Figure 9. Light scattering experiments to detect  $\text{OCN}^-$  permeation through Fluc-Bpe channels.** For permeant ions, efflux from proteoliposomes upon valinomycin addition (black triangle) causes an increase in  $90^\circ$  light scatter[35]. Light scattering traces shown for empty liposomes (blue) and Fluc-Bpe liposomes (orange), reconstituted with internal KOCN (a), KF (b) or KCl (c).

**Supplementary Figure 10. Titration of  $\text{SCN}^-$  into WT and E88Q bilayers.** These experiments were performed in the WT background rather than with oriented S83C channels. Solid line represents a fit to a two-site binding model, with the fractional inhibition of 0.5 at each site. The parameters of the fits are shown in Supplementary Table 2.

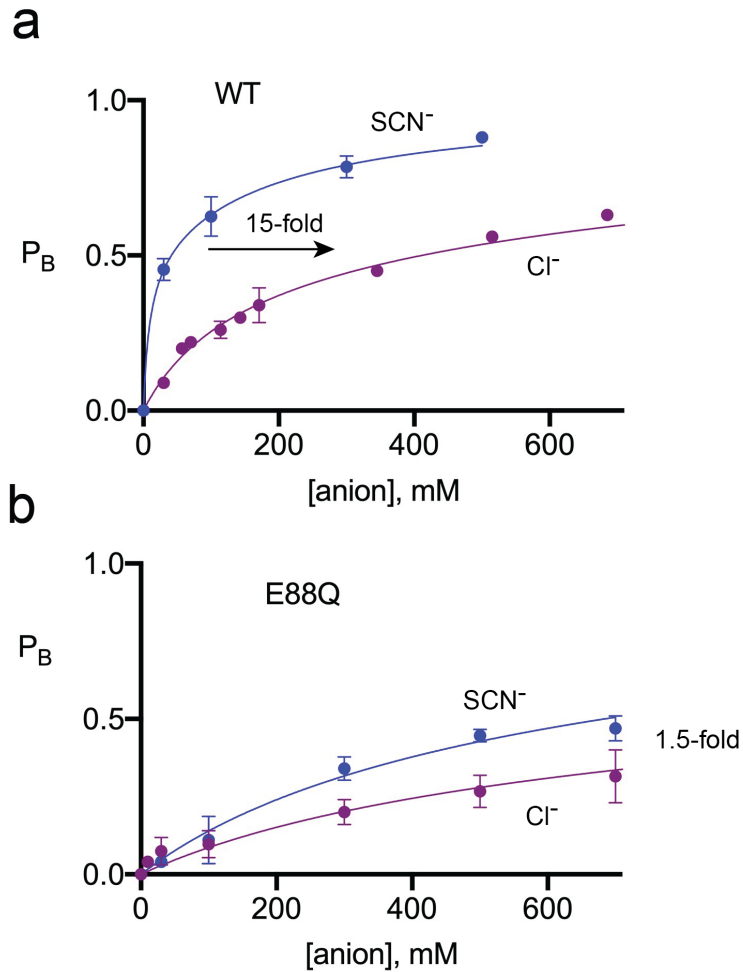

**Supplementary Figure 11. Anion conduction by Fluc-Bpe and Fluc-Ec2 mutants.** Image shows structure of Fluc-Bpe and uses Fluc-Bpe numbering. Sidechains colored in yellow line the permeation pathway. Table below shows the compiled results of anion transport experiments for Fluc-Bpe and Fluc-Ec2. Results from Fluc-Ec2 are shown in italics, with numbering according to Fluc-Bpe for reference to the structure. Fluc-Ec2 mutants are not shown if the sidechain is not conserved in Fluc-Bpe.

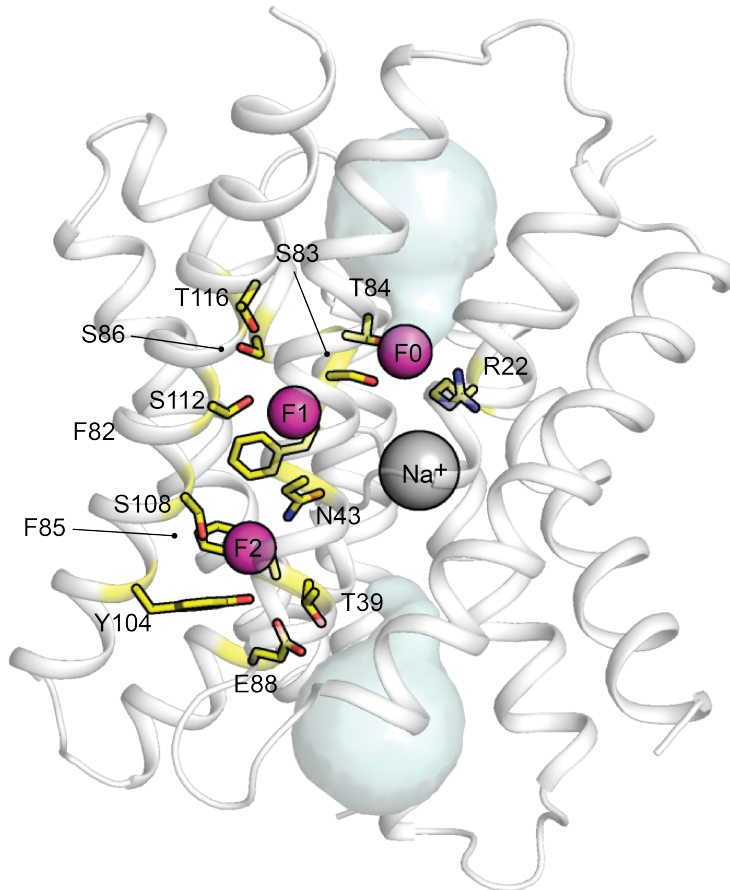

| Reference | Mutant (no F <sup>-</sup> permeation)                                | Mutant (F <sup>-</sup> permeation retained, no Cl <sup>-</sup> permeation) |
|-----------|----------------------------------------------------------------------|----------------------------------------------------------------------------|
| [5]       |                                                                      | F82I, F85I, N43D                                                           |
| [6]       | <i>F82I, F85I</i>                                                    |                                                                            |
| [11]      | <i>F82Y, F82S, F82A, F82L, F82I, F82T, F85Y, F85S, F85A</i>          | <i>S112A, T116V, T116I, S83A, F82M</i>                                     |
| [10]      |                                                                      | N43S, R22K                                                                 |
| This work | S83T, S83C, T39A, T39V, T39C, T39N, E88K, Y104S, Y104H, Y104W, Y104I | S83A, S83A/S84A, Y104F, T39S, E88Q, E88D, E88A                             |

## References:

1. Baker JL, Sudarsan N, Weinberg Z, Roth A, Stockbridge RB, Breaker RR: **Widespread genetic switches and toxicity resistance proteins for fluoride.** *Science* 2012, **335**:233-235.
2. Ji C, Stockbridge RB, Miller C: **Bacterial fluoride resistance, Fluc channels, and the weak acid accumulation effect.** *The Journal of General Physiology* 2014, **144**:257-261.
3. Stockbridge RB, Koide A, Miller C, Koide S: **Proof of dual-topology architecture of Fluc F-channels with monobody blockers.** *Nat Commun* 2014, **5**:5120.
4. Stockbridge RB, Robertson JL, Kolmakova-Partensky L, Miller C: **A family of fluoride-specific ion channels with dual-topology architecture.** *Elife* 2013, **2**:e01084.
5. Stockbridge RB, Kolmakova-Partensky L, Shane T, Koide A, Koide S, Miller C, Newstead S: **Crystal structures of a double-barrelled fluoride ion channel.** *Nature* 2015, **525**:548-551.
6. Last NB, Kolmakova-Partensky L, Shane T, Miller C: **Mechanistic signs of double-barreled structure in a fluoride ion channel.** *Elife* 2016, **5**.
7. Turman DL, Nathanson JT, Stockbridge RB, Street TO, Miller C: **Two-sided block of a dual-topology F- channel.** *Proc Natl Acad Sci U S A* 2015, **112**:5697-5701.
8. Turman DL, Stockbridge RB: **Mechanism of single- and double-sided inhibition of dual topology fluoride channels by synthetic monobodies.** *J Gen Physiol* 2017.
9. McIlwain BC, Newstead S, Stockbridge RB: **Cork-in-Bottle Occlusion of Fluoride Ion Channels by Crystallization Chaperones.** *Structure* 2018, **26**:635-639 e631.
10. McIlwain BC, Martin K, Hayter EA, Stockbridge RB: **An Interfacial Sodium Ion is an Essential Structural Feature of Fluc Family Fluoride Channels.** *J Mol Biol* 2020.
11. Last NB, Sun S, Pham MC, Miller C: **Molecular determinants of permeation in a fluoride-specific ion channel.** *Elife* 2017, **6**.
12. Li S, Smith KD, Davis JH, Gordon PB, Breaker RR, Strobel SA: **Eukaryotic resistance to fluoride toxicity mediated by a widespread family of fluoride export proteins.** *Proceedings of the National Academy of Sciences* 2013, **110**:19018-19023.
13. Smith KD, Gordon PB, Rivetta A, Allen KE, Berbasova T, Slayman C, Strobel SA: **Yeast Fex1p Is a Constitutively Expressed Fluoride Channel with Functional Asymmetry of Its Two Homologous Domains.** *Journal of Biological Chemistry* 2015, **290**:19874-19887.
14. Berbasova T, Nallur S, Sells T, Smith KD, Gordon PB, Tausta SL, Strobel SA: **Fluoride export (FEX) proteins from fungi, plants and animals are 'single barreled' channels containing one functional and one vestigial ion pore.** *PLoS One* 2017, **12**:e0177096.
15. Macdonald CB, Stockbridge RB: **A topologically diverse family of fluoride channels.** *Curr Opin Struct Biol* 2017, **45**:142-149.
16. Mistry J, Chuguransky S, Williams L, Qureshi M, Salazar GA, Sonnhammer ELL, Tosatto SCE, Paladin L, Raj S, Richardson LJ, et al.: **Pfam: The protein families database in 2021.** *Nucleic Acids Res* 2021, **49**:D412-D419.
17. Doyle DA, Morais Cabral J, Pfuetschner RA, Kuo A, Gulbis JM, Cohen SL, Chait BT, MacKinnon R: **The structure of the potassium channel: molecular basis of K<sup>+</sup> conduction and selectivity.** *Science* 1998, **280**:69-77.
18. Latorre R, Miller C: **Conduction and Selectivity in Potassium Channels.** *Journal of Membrane Biology* 1983, **71**:11-30.
19. Payandeh J, Scheuer T, Zheng N, Catterall WA: **The crystal structure of a voltage-gated sodium channel.** *Nature* 2011, **475**:353-358.
20. Pike SJ, Hutchinson JJ, Hunter CA: **H-Bond Acceptor Parameters for Anions.** *J Am Chem Soc* 2017, **139**:6700-6706.
21. Gilli P, Pretto L, Bertolasi V, Gilli G: **Predicting hydrogen-bond strengths from acid-base molecular properties. The pK(a) slide rule: toward the solution of a long-lasting problem.** *Acc Chem Res* 2009, **42**:33-44.



22. Hou X, Outhwaite IR, Pedi L, Long SB: **Cryo-EM structure of the calcium release-activated calcium channel Orai in an open conformation.** *Elife* 2020, **9**.
23. Sather WA, McCleskey EW: **Permeation and selectivity in calcium channels.** *Annu Rev Physiol* 2003, **65**:133-159.
24. Bostick DL, Brooks CL, 3rd: **Selectivity in K<sup>+</sup> channels is due to topological control of the permeant ion's coordinated state.** *Proc Natl Acad Sci U S A* 2007, **104**:9260-9265.
25. Bostick DL, Brooks CL: **Statistical Determinants of Selective Ionic Complexation: Ions in Solvent, Transport Proteins, and Other "Hosts".** *Biophysical Journal* 2009, **96**:4470-4492.
26. Ohtaki H, Radnai T: **Structure and Dynamics of Hydrated Ions.** *Chemical Reviews* 1993, **93**:1157-1204.
27. Cametti M, Rissanen K: **Recognition and sensing of fluoride anion.** *Chem Commun (Camb)* 2009:2809-2829.
28. Merchant S, Asthagiri D: **Thermodynamically dominant hydration structures of aqueous ions.** *Journal of Chemical Physics* 2009, **130**.
29. Schultz SG, Wilson NL, Epstein W: **Cation transport in Escherichia coli. II. Intracellular chloride concentration.** *J Gen Physiol* 1962, **46**:159-166.
30. McCoy AJ, Grosse-Kunstleve RW, Adams PD, Winn MD, Storoni LC, Read RJ: **Phaser crystallographic software.** *J Appl Crystallogr* 2007, **40**:658-674.
31. Murshudov GN, Skubak P, Lebedev AA, Pannu NS, Steiner RA, Nicholls RA, Winn MD, Long F, Vagin AA: **REFMAC5 for the refinement of macromolecular crystal structures.** *Acta Crystallogr D Biol Crystallogr* 2011, **67**:355-367.
32. Liebschner D, Afonine PV, Baker ML, Bunkoczi G, Chen VB, Croll TI, Hintze B, Hung LW, Jain S, McCoy AJ, et al.: **Macromolecular structure determination using X-rays, neutrons and electrons: recent developments in Phenix.** *Acta Crystallogr D Struct Biol* 2019, **75**:861-877.
33. Emsley P, Lohkamp B, Scott WG, Cowtan K: **Features and development of Coot.** *Acta Crystallogr D Biol Crystallogr* 2010, **66**:486-501.
34. Brammer AE, Stockbridge RB, Miller C: **F<sup>-</sup>/Cl<sup>-</sup> selectivity in CLCF-type F<sup>-</sup>/H<sup>+</sup> antiporters.** *J Gen Physiol* 2014, **144**:129-136.
35. Stockbridge RB, Lim HH, Otten R, Williams C, Shane T, Weinberg Z, Miller C: **Fluoride resistance and transport by riboswitch-controlled CLC antiporters.** *Proc Natl Acad Sci U S A* 2012, **109**:15289-15294.
36. Smith SS, Steinle ED, Meyerhoff ME, Dawson DC: **Cystic fibrosis transmembrane conductance regulator. Physical basis for lyotropic anion selectivity patterns.** *J Gen Physiol* 1999, **114**:799-818.
